# Supplementary material
Source: Frontiers journal article supplement (https://www.frontiersin.org/articles/42759)
Supplement: Data_Sheet_1.XLSX [file Data_Sheet_1.XLSX]

## Sheet: Supplemental Table 1
Supplementary Information Table S1. Genes associated with the metabolism of aromatic compounds detected in the GoM metagenomes.
	Functional Annotation using MG-RAST Subsystems
Metagenome	Level 1	Level 2	Level 3	Function	Abundance	Avg e-value	Avg % ident.	Avg align. Len.	# Hits
GoM023	Metabolism of Aromatic Compounds	Anaerobic degradation of aromatic compounds	Acetophenone carboxylase 1	Acetophenone carboxylase subunit Apc3	1	-14	68.63	51	1
GoM023	Metabolism of Aromatic Compounds	Anaerobic degradation of aromatic compounds	Acetophenone carboxylase 1	Acetophenone carboxylase subunit Apc4	1	-69	77.92	154	1
GoM023	Metabolism of Aromatic Compounds	Anaerobic degradation of aromatic compounds	Anaerobic benzoate metabolism	2-ketocyclohexanecarboxyl-CoA hydrolase (EC 4.1.3.36)	3	-23	65.2	76	2
GoM023	Metabolism of Aromatic Compounds	Anaerobic degradation of aromatic compounds	Anaerobic benzoate metabolism	3-hydroxybutyryl-CoA dehydrogenase (EC 1.1.1.157)	13	-29.55	73.2	83.73	10
GoM023	Metabolism of Aromatic Compounds	Anaerobic degradation of aromatic compounds	Anaerobic benzoate metabolism	Acetyl-CoA acetyltransferase (EC 2.3.1.9)	46	-27.06	69.51	85.31	46
GoM023	Metabolism of Aromatic Compounds	Anaerobic degradation of aromatic compounds	Anaerobic benzoate metabolism	Benzoate-CoA ligase (EC 6.2.1.25)	8	-19.62	68.57	68.38	7
GoM023	Metabolism of Aromatic Compounds	Anaerobic degradation of aromatic compounds	Anaerobic benzoate metabolism	Benzoyl-CoA reductase subunit BadE (EC 1.3.99.15)	1	-40	65.79	114	1
GoM023	Metabolism of Aromatic Compounds	Anaerobic degradation of aromatic compounds	Anaerobic benzoate metabolism	Benzoyl-CoA reductase subunit BadF (EC 1.3.99.15)	2	-43.5	83.14	101	2
GoM023	Metabolism of Aromatic Compounds	Anaerobic degradation of aromatic compounds	Anaerobic benzoate metabolism	Glutaryl-CoA dehydrogenase (EC 1.3.99.7)	17	-33.76	68.77	99.82	15
GoM023	Metabolism of Aromatic Compounds	Anaerobic degradation of aromatic compounds	Anaerobic toluene and ethylbenzene degradation	Acetophenone carboxylase subunit Apc3	1	-14	68.63	51	1
GoM023	Metabolism of Aromatic Compounds	Anaerobic degradation of aromatic compounds	Anaerobic toluene and ethylbenzene degradation	Acetophenone carboxylase subunit Apc4	1	-69	77.92	154	1
GoM023	Metabolism of Aromatic Compounds	Anaerobic degradation of aromatic compounds	Anaerobic toluene and ethylbenzene degradation	Ethylbenzene dehydrogenase alpha subunit (EC 1.17.99.2)	1	-15	52.56	78	1
GoM023	Metabolism of Aromatic Compounds	Anaerobic degradation of aromatic compounds	Anaerobic toluene and ethylbenzene degradation	Succinyl-CoA:(R)-benzylsuccinate CoA-transferase subunit BbsE (EC 2.8.3.15)	1	-13	57.58	66	1
GoM023	Metabolism of Aromatic Compounds	Anaerobic degradation of aromatic compounds	Anaerobic toluene and ethylbenzene degradation	Succinyl-CoA:(R)-benzylsuccinate CoA-transferase subunit BbsF (EC 2.8.3.15)	1	-10	62	50	1
GoM023	Metabolism of Aromatic Compounds	Aromatic Amin Catabolism	-	4-hydroxyphenylacetate 3-monooxygenase (EC 1.14.13.3)	11	-17.07	70.29	57.71	11
GoM023	Metabolism of Aromatic Compounds	Aromatic Amin Catabolism	-	Monoamine oxidase (1.4.3.4)	5	-15.2	62.37	57.2	5
GoM023	Metabolism of Aromatic Compounds	Aromatic Amin Catabolism	-	Phenylacetaldehyde dehydrogenase (EC 1.2.1.39)	2	-19	56.55	79.5	2
GoM023	Metabolism of Aromatic Compounds	Benzoate transport and degradation cluster	-	2-keto-4-pentenoate hydratase/2-oxohepta-3-ene-1,7-dioic acid hydratase (catechol pathway)	3	-26.33	71.2	78	3
GoM023	Metabolism of Aromatic Compounds	Benzoate transport and degradation cluster	-	4-oxalocrotonate decarboxylase (EC 4.1.1.77)	1	-26	67.47	83	1
GoM023	Metabolism of Aromatic Compounds	Benzoate transport and degradation cluster	-	benzoate degradation ring-cleavage hydrolase	2	-12	65.38	50.5	2
GoM023	Metabolism of Aromatic Compounds	Benzoate transport and degradation cluster	-	Benzoate transport, ATP binding protein	1	-29	68.48	92	1
GoM023	Metabolism of Aromatic Compounds	Benzoate transport and degradation cluster	-	Benzoate-CoA ligase (EC 6.2.1.25)	8	-19.62	68.57	68.38	7
GoM023	Metabolism of Aromatic Compounds	Benzoate transport and degradation cluster	-	Benzoyl-CoA oxygenase component B	6	-31.83	72.77	86.33	6
GoM023	Metabolism of Aromatic Compounds	Benzoate transport and degradation cluster	-	benzoyl-CoA-dihydrodiol lyase (BoxC)	9	-29.88	69.57	89	7
GoM023	Metabolism of Aromatic Compounds	Benzoate transport and degradation cluster	-	Shikimate kinase I (EC 2.7.1.71)	10	-13.8	63.48	62	10
GoM023	Metabolism of Aromatic Compounds	Benzoate transport and degradation cluster	-	Shikimate kinase II (EC 2.7.1.71)	2	-28.5	69.78	92.5	1
GoM023	Metabolism of Aromatic Compounds	Gentisare degradation	-	Fumarylacetoacetate hydrolase family protein	11	-31	66.73	96.58	11
GoM023	Metabolism of Aromatic Compounds	Gentisare degradation	-	Gentisate 1,2-dioxygenase (EC 1.13.11.4)	6	-15.17	63.06	57.5	5
GoM023	Metabolism of Aromatic Compounds	Gentisare degradation	-	Putative n-hydroxybenzoate hydroxylase	1	-22	59.76	82	1
GoM023	Metabolism of Aromatic Compounds	Metabolism of central aromatic intermediates	4-Hydroxyphenylacetic acid catabolic pathway	4-hydroxyphenylacetate 3-monooxygenase (EC 1.14.13.3)	11	-17.07	70.29	57.71	11
GoM023	Metabolism of Aromatic Compounds	Metabolism of central aromatic intermediates	4-Hydroxyphenylacetic acid catabolic pathway	5-carboxymethyl-2-hydroxymuconate semialdehyde dehydrogenase (EC 1.2.1.60)	2	-17.5	59.08	69	2
GoM023	Metabolism of Aromatic Compounds	Metabolism of central aromatic intermediates	Catechol branch of beta-ketoadipate pathway	3-oxoadipate CoA-transferase subunit A (EC 2.8.3.6)	4	-14.2	71.43	51.4	3
GoM023	Metabolism of Aromatic Compounds	Metabolism of central aromatic intermediates	Catechol branch of beta-ketoadipate pathway	3-oxoadipate CoA-transferase subunit B (EC 2.8.3.6)	3	-22.67	63.46	78.67	3
GoM023	Metabolism of Aromatic Compounds	Metabolism of central aromatic intermediates	Catechol branch of beta-ketoadipate pathway	Catechol 1,2-dioxygenase 1 (EC 1.13.11.1)	1	-17	54.43	79	1
GoM023	Metabolism of Aromatic Compounds	Metabolism of central aromatic intermediates	Catechol branch of beta-ketoadipate pathway	Muconate cycloisomerase (EC 5.5.1.1)	3	-20.75	63.67	81.75	3
GoM023	Metabolism of Aromatic Compounds	Metabolism of central aromatic intermediates	Catechol branch of beta-ketoadipate pathway	Muconolactone isomerase (EC 5.3.3.4)	4	-16	71.93	52.33	3
GoM023	Metabolism of Aromatic Compounds	Metabolism of central aromatic intermediates	Catechol branch of beta-ketoadipate pathway	Muconolactone isomerase (EC 5.3.3.4),putative	4	-16	71.93	52.33	3
GoM023	Metabolism of Aromatic Compounds	Metabolism of central aromatic intermediates	Catechol branch of beta-ketoadipate pathway	Succinyl-CoA:3-ketoacid-coenzyme A transferase subunit B (EC 2.8.3.5)	2	-40	72.5	102	2
GoM023	Metabolism of Aromatic Compounds	Metabolism of central aromatic intermediates	Central meta-cleavage pathway of aromatic compound degradation	4-oxalocrotonate tautomerase (EC 5.3.2.-)	1	-18	69.84	63	1
GoM023	Metabolism of Aromatic Compounds	Metabolism of central aromatic intermediates	Central meta-cleavage pathway of aromatic compound degradation	5-carboxymethyl-2-hydroxymuconate semialdehyde dehydrogenase (EC 1.2.1.60)	2	-17.5	59.08	69	2
GoM023	Metabolism of Aromatic Compounds	Metabolism of central aromatic intermediates	Central meta-cleavage pathway of aromatic compound degradation	Catechol 2,3-dioxygenase (EC 1.13.11.2)	1	-33	70.24	84	1
GoM023	Metabolism of Aromatic Compounds	Metabolism of central aromatic intermediates	Central meta-cleavage pathway of aromatic compound degradation	Protocatechuate 4,5-dioxygenase alpha chain (EC 1.13.11.8)	1	-29	71.43	84	1
GoM023	Metabolism of Aromatic Compounds	Metabolism of central aromatic intermediates	Central meta-cleavage pathway of aromatic compound degradation	Protocatechuate 4,5-dioxygenase beta chain (EC 1.13.11.8)	2	-27.5	77.42	77.5	2
GoM023	Metabolism of Aromatic Compounds	Metabolism of central aromatic intermediates	Homogentisate pathway of aromatic compound degradation	4-hydroxyphenylpyruvate dioxygenase (EC 1.13.11.27)	7	-21.86	68.85	71.43	7
GoM023	Metabolism of Aromatic Compounds	Metabolism of central aromatic intermediates	Homogentisate pathway of aromatic compound degradation	Aromatic-amino-acid aminotransferase (EC 2.6.1.57)	5	-28.4	63.4	90.6	4
GoM023	Metabolism of Aromatic Compounds	Metabolism of central aromatic intermediates	Homogentisate pathway of aromatic compound degradation	Fumarylacetoacetase (EC 3.7.1.2)	7	-22.43	67.4	71.71	5
GoM023	Metabolism of Aromatic Compounds	Metabolism of central aromatic intermediates	Homogentisate pathway of aromatic compound degradation	Homogentisate 1,2-dioxygenase (EC 1.13.11.5)	5	-24.8	64.81	81.6	5
GoM023	Metabolism of Aromatic Compounds	Metabolism of central aromatic intermediates	N-heterocyclic aromatic compound degradation	Isoquinoline 1-oxidoreductase alpha subunit (EC 1.3.99.16)	10	-18.5	65.19	63.5	10
GoM023	Metabolism of Aromatic Compounds	Metabolism of central aromatic intermediates	N-heterocyclic aromatic compound degradation	Isoquinoline 1-oxidoreductase beta subunit (EC 1.3.99.16)	36	-11.94	66.68	53.8	33
GoM023	Metabolism of Aromatic Compounds	Metabolism of central aromatic intermediates	Protocatechuate branch of beta-ketoadipate pathway	3-oxoadipate CoA-transferase subunit A (EC 2.8.3.6)	4	-14.2	71.43	51.4	3
GoM023	Metabolism of Aromatic Compounds	Metabolism of central aromatic intermediates	Protocatechuate branch of beta-ketoadipate pathway	3-oxoadipate CoA-transferase subunit B (EC 2.8.3.6)	3	-22.67	63.46	78.67	3
GoM023	Metabolism of Aromatic Compounds	Metabolism of central aromatic intermediates	Protocatechuate branch of beta-ketoadipate pathway	4-carboxymuconolactone decarboxylase (EC 4.1.1.44)	2	-25	64.21	88.5	2
GoM023	Metabolism of Aromatic Compounds	Metabolism of central aromatic intermediates	Protocatechuate branch of beta-ketoadipate pathway	Beta-ketoadipyl CoA thiolase (EC 2.3.1.-)	11	-30.4	68.95	95	10
GoM023	Metabolism of Aromatic Compounds	Metabolism of central aromatic intermediates	Protocatechuate branch of beta-ketoadipate pathway	Succinyl-CoA:3-ketoacid-coenzyme A transferase subunit B (EC 2.8.3.5)	2	-40	72.5	102	2
GoM023	Metabolism of Aromatic Compounds	Metabolism of central aromatic intermediates	Salicylate and gentisate catabolism	AreB (Aryl-alcohol dehydrogenase) (EC 1.1.1.90)	1	-27	60	90	1
GoM023	Metabolism of Aromatic Compounds	Metabolism of central aromatic intermediates	Salicylate and gentisate catabolism	Fumarylacetoacetase (EC 3.7.1.2)	7	-22.43	67.4	71.71	5
GoM023	Metabolism of Aromatic Compounds	Metabolism of central aromatic intermediates	Salicylate and gentisate catabolism	Fumarylacetoacetate hydrolase family protein	11	-31	66.73	96.58	11
GoM023	Metabolism of Aromatic Compounds	Metabolism of central aromatic intermediates	Salicylate and gentisate catabolism	Gentisate 1,2-dioxygenase (EC 1.13.11.4)	6	-15.17	63.06	57.5	5
GoM023	Metabolism of Aromatic Compounds	Metabolism of central aromatic intermediates	Salicylate and gentisate catabolism	Putative n-hydroxybenzoate hydroxylase	1	-22	59.76	82	1
GoM023	Metabolism of Aromatic Compounds	Metabolism of central aromatic intermediates	Salicylate and gentisate catabolism	salicylate esterase	2	-18	67.63	72	2
GoM023	Metabolism of Aromatic Compounds	p-cymene degradation	-	HCOMODA decarboxylase	1	-14	64.41	59	1
GoM023	Metabolism of Aromatic Compounds	p-cymene degradation	-	p-cumic aldehyde dehydrogenase (CymC) [EC:1.2.1.3]	1	-17	59.21	76	1
GoM023	Metabolism of Aromatic Compounds	Peripheral pathways for catabolism of aromatic compounds	Benzoate catabolism	Muconate cycloisomerase (EC 5.5.1.1)	3	-20.75	63.67	81.75	3
GoM023	Metabolism of Aromatic Compounds	Peripheral pathways for catabolism of aromatic compounds	Benzoate catabolism	Muconolactone isomerase (EC 5.3.3.4)	4	-16	71.93	52.33	3
GoM023	Metabolism of Aromatic Compounds	Peripheral pathways for catabolism of aromatic compounds	Benzoate degradation	Benzoylformate decarboxylase (EC 4.1.1.7)	4	-17.8	68.65	62.2	4
GoM023	Metabolism of Aromatic Compounds	Peripheral pathways for catabolism of aromatic compounds	Benzoate degradation	Ortho-halobenzoate 1,2-dioxygenase alpha-ISP protein OhbB	4	-12.4	61.68	57	3
GoM023	Metabolism of Aromatic Compounds	Peripheral pathways for catabolism of aromatic compounds	Biphenyl Degradation	Acetaldehyde dehydrogenase (EC 1.2.1.10)	3	-12.33	67.59	58.67	3
GoM023	Metabolism of Aromatic Compounds	Peripheral pathways for catabolism of aromatic compounds	Biphenyl Degradation	Biphenyl-2,3-diol 1,2-dioxygenase (EC 1.13.11.39)	1	-28	69.14	81	1
GoM023	Metabolism of Aromatic Compounds	Peripheral pathways for catabolism of aromatic compounds	Biphenyl Degradation	Large subunit naph/bph dioxygenase	3	-13	65.47	54	2
GoM023	Metabolism of Aromatic Compounds	Peripheral pathways for catabolism of aromatic compounds	Chloroaromatic degradation pathway	3-oxoadipate CoA-transferase subunit A (EC 2.8.3.6)	4	-14.2	71.43	51.4	3
GoM023	Metabolism of Aromatic Compounds	Peripheral pathways for catabolism of aromatic compounds	Chloroaromatic degradation pathway	3-oxoadipate CoA-transferase subunit B (EC 2.8.3.6)	3	-22.67	63.46	78.67	3
GoM023	Metabolism of Aromatic Compounds	Peripheral pathways for catabolism of aromatic compounds	Chloroaromatic degradation pathway	Beta-ketoadipyl CoA thiolase (EC 2.3.1.-)	11	-30.4	68.95	95	10
GoM023	Metabolism of Aromatic Compounds	Peripheral pathways for catabolism of aromatic compounds	Chlorobenzoate degradation	Muconate cycloisomerase (EC 5.5.1.1)	3	-20.75	63.67	81.75	3
GoM023	Metabolism of Aromatic Compounds	Peripheral pathways for catabolism of aromatic compounds	Chlorobenzoate degradation	Putative benzaldehyde dehydrogenase oxidoreductase protein (EC 1.2.1.28)	1	-22	63.64	77	1
GoM023	Metabolism of Aromatic Compounds	Peripheral pathways for catabolism of aromatic compounds	n-Phenylalkanoic acid degradation	3-hydroxyacyl-CoA dehydrogenase (EC 1.1.1.35)	48	-20.8	66.63	74.36	42
GoM023	Metabolism of Aromatic Compounds	Peripheral pathways for catabolism of aromatic compounds	n-Phenylalkanoic acid degradation	3-hydroxybutyryl-CoA epimerase (EC 5.1.2.3)	23	-22.09	65.71	78.32	21
GoM023	Metabolism of Aromatic Compounds	Peripheral pathways for catabolism of aromatic compounds	n-Phenylalkanoic acid degradation	3-ketoacyl-CoA thiolase (EC 2.3.1.16)	49	-27.69	69.32	86.11	49
GoM023	Metabolism of Aromatic Compounds	Peripheral pathways for catabolism of aromatic compounds	n-Phenylalkanoic acid degradation	Delta(3)-cis-delta(2)-trans-enoyl-CoA isomerase (EC 5.3.3.8)	15	-22.47	66.31	80.67	14
GoM023	Metabolism of Aromatic Compounds	Peripheral pathways for catabolism of aromatic compounds	n-Phenylalkanoic acid degradation	Enoyl-CoA hydratase (EC 4.2.1.17)	94	-15.52	66.24	62.39	94
GoM023	Metabolism of Aromatic Compounds	Peripheral pathways for catabolism of aromatic compounds	n-Phenylalkanoic acid degradation	Long-chain-fatty-acid--CoA ligase (EC 6.2.1.3)	153	-14.05	67.81	56.56	153
GoM023	Metabolism of Aromatic Compounds	Peripheral pathways for catabolism of aromatic compounds	Phenol hydroxylase	Phenol hydroxylase, P1 oxygenase component DmpL (EC 1.14.13.7)	1	-26	68.06	72	1
GoM023	Metabolism of Aromatic Compounds	Peripheral pathways for catabolism of aromatic compounds	Phenylpropanoid compound degradation	4-hydroxycinnamoyl CoA hydratase/lyase (Enoyl-CoA hydratase/lyase) (EC 4.2.1.17)	2	-11	57.98	59.5	2
GoM023	Metabolism of Aromatic Compounds	Peripheral pathways for catabolism of aromatic compounds	Phenylpropanoid compound degradation	Chlorogenate esterase	2	-10	56.79	53	2
GoM023	Metabolism of Aromatic Compounds	Peripheral pathways for catabolism of aromatic compounds	Phenylpropanoid compound degradation	Feruloyl-CoA synthetase	1	-16	65.52	58	1
GoM023	Metabolism of Aromatic Compounds	Peripheral pathways for catabolism of aromatic compounds	Phenylpropanoid compound degradation	Lignostilbene-alpha,beta-dioxygenase and related enzymes	5	-13.4	64.28	53.8	5
GoM023	Metabolism of Aromatic Compounds	Peripheral pathways for catabolism of aromatic compounds	Phenylpropanoid compound degradation	Probable FERULIC acid hydratase protein	1	-13	57.97	69	1
GoM023	Metabolism of Aromatic Compounds	Peripheral pathways for catabolism of aromatic compounds	Phenylpropanoid compound degradation	Putative benzaldehyde dehydrogenase oxidoreductase protein (EC 1.2.1.28)	1	-22	63.64	77	1
GoM023	Metabolism of Aromatic Compounds	Peripheral pathways for catabolism of aromatic compounds	Phenylpropanoid compound degradation	Putative phthalate 4,5-dioxygenase oxygenase subunit (OhpA2)	3	-19.83	66.03	66.83	2
GoM023	Metabolism of Aromatic Compounds	Peripheral pathways for catabolism of aromatic compounds	Phenylpropanoid compound degradation	Vanillate O-demethylase oxygenase subunit (EC 1.14.13.82)	2	-15.5	64.61	67	2
GoM023	Metabolism of Aromatic Compounds	Peripheral pathways for catabolism of aromatic compounds	p-Hydroxybenzoate degradation	P-hydroxybenzoate hydroxylase (EC 1.14.13.2)	1	-20	68.25	63	1
GoM023	Metabolism of Aromatic Compounds	Peripheral pathways for catabolism of aromatic compounds	Quinate degradation	3-dehydroquinate dehydratase I (EC 4.2.1.10)	2	-37.5	89.81	87.5	1
GoM023	Metabolism of Aromatic Compounds	Peripheral pathways for catabolism of aromatic compounds	Quinate degradation	3-dehydroquinate dehydratase II (EC 4.2.1.10)	8	-12.29	65.33	54.57	7
GoM023	Metabolism of Aromatic Compounds	Peripheral pathways for catabolism of aromatic compounds	Quinate degradation	Quinate/shikimate dehydrogenase [Pyrroloquinoline-quinone] (EC 1.1.99.25)	3	-13.83	65.21	53.83	3
GoM023	Metabolism of Aromatic Compounds	Peripheral pathways for catabolism of aromatic compounds	Salicylate ester degradation	AreB (Aryl-alcohol dehydrogenase) (EC 1.1.1.90)	1	-27	60	90	1
GoM023	Metabolism of Aromatic Compounds	Peripheral pathways for catabolism of aromatic compounds	Salicylate ester degradation	salicylate esterase	2	-18	67.63	72	2
GoM023	Metabolism of Aromatic Compounds	Phenylacetyl-CoA catabolic pathway (core)	-	3-hydroxyacyl-CoA dehydrogenase PaaC (EC 1.1.1.-)	1	-17	61.43	70	1
GoM023	Metabolism of Aromatic Compounds	Phenylacetyl-CoA catabolic pathway (core)	-	Phenylacetaldehyde dehydrogenase (EC 1.2.1.39)	2	-19	56.55	79.5	2
GoM023	Metabolism of Aromatic Compounds	Phenylacetyl-CoA catabolic pathway (core)	-	Phenylacetate degradation enoyl-CoA hydratase PaaA (EC 4.2.1.17)	2	-32.5	63.54	102	2
GoM023	Metabolism of Aromatic Compounds	Phenylacetyl-CoA catabolic pathway (core)	-	Phenylacetate-CoA oxygenase, PaaG subunit	3	-55.67	80.27	126	3
GoM023	Metabolism of Aromatic Compounds	Phenylacetyl-CoA catabolic pathway (core)	-	Phenylacetate-coenzyme A ligase (EC 6.2.1.30) PaaF	1	-52	81.9	116	1
GoM023	Metabolism of Aromatic Compounds	Phenylacetyl-CoA catabolic pathway (core)	-	Phenylacetic acid degradation protein PaaE, ketothiolase	1	-18	61.84	76	1
GoM023	Metabolism of Aromatic Compounds	Phenylacetyl-CoA catabolic pathway (core)	-	Phenylacetic acid degradation protein PaaN, ring-opening aldehyde dehydrogenase (EC 1.2.1.3)	5	-20.8	69.18	73.6	5
GoM023	Metabolism of Aromatic Compounds	Phenylacetyl-CoA catabolic pathway (core)	-	Phenylacetic acid degradation protein PaaY	1	-13	63.79	58	1
GoM278	Metabolism of Aromatic Compounds	Anaerobic degradation of aromatic compounds	Anaerobic benzoate metabolism	2-hydroxycyclohexanecarboxyl-CoA dehydrogenase (EC 1.1.1.-)	4	-13.5	66.86	55.75	4
GoM278	Metabolism of Aromatic Compounds	Anaerobic degradation of aromatic compounds	Anaerobic benzoate metabolism	3-hydroxybutyryl-CoA dehydrogenase (EC 1.1.1.157)	13	-17.46	71.34	60.85	11
GoM278	Metabolism of Aromatic Compounds	Anaerobic degradation of aromatic compounds	Anaerobic benzoate metabolism	Acetyl-CoA acetyltransferase (EC 2.3.1.9)	53	-25.98	70.42	83.92	48
GoM278	Metabolism of Aromatic Compounds	Anaerobic degradation of aromatic compounds	Anaerobic benzoate metabolism	Benzoate-CoA ligase (EC 6.2.1.25)	4	-12.75	64.24	55.75	4
GoM278	Metabolism of Aromatic Compounds	Anaerobic degradation of aromatic compounds	Anaerobic benzoate metabolism	Benzoyl-CoA reductase subunit BadD (EC 1.3.99.15)	7	-19.83	69.72	66	6
GoM278	Metabolism of Aromatic Compounds	Anaerobic degradation of aromatic compounds	Anaerobic benzoate metabolism	Benzoyl-CoA reductase subunit BadE (EC 1.3.99.15)	2	-27.5	73.25	76	2
GoM278	Metabolism of Aromatic Compounds	Anaerobic degradation of aromatic compounds	Anaerobic benzoate metabolism	Benzoyl-CoA reductase subunit BadF (EC 1.3.99.15)	1	-14	64.81	54	1
GoM278	Metabolism of Aromatic Compounds	Anaerobic degradation of aromatic compounds	Anaerobic benzoate metabolism	Benzoyl-CoA reductase subunit BadG (EC 1.3.99.15)	2	-22.5	70.83	70.5	2
GoM278	Metabolism of Aromatic Compounds	Anaerobic degradation of aromatic compounds	Anaerobic benzoate metabolism	Glutaryl-CoA dehydrogenase (EC 1.3.99.7)	7	-31.43	72.01	91.57	7
GoM278	Metabolism of Aromatic Compounds	Anaerobic degradation of aromatic compounds	Anaerobic toluene and ethylbenzene degradation	(R)-benzylsuccinyl-CoA dehydrogenase (EC 1.3.99.21)	1	-41	78.43	102	1
GoM278	Metabolism of Aromatic Compounds	Anaerobic degradation of aromatic compounds	Anaerobic toluene and ethylbenzene degradation	Succinyl-CoA:(R)-benzylsuccinate CoA-transferase subunit BbsF (EC 2.8.3.15)	2	-13.5	59.68	61.5	2
GoM278	Metabolism of Aromatic Compounds	Aromatic Amin Catabolism	-	4-hydroxyphenylacetate 3-monooxygenase (EC 1.14.13.3)	7	-16.6	77.28	53.8	7
GoM278	Metabolism of Aromatic Compounds	Aromatic Amin Catabolism	-	Nitrilotriacetate monooxygenase component B (EC 1.14.13.-)	4	-11.25	63.29	52	4
GoM278	Metabolism of Aromatic Compounds	Benzoate transport and degradation cluster	-	Benzoate transport, inner-membrane translocator	4	-14	59.37	63.75	3
GoM278	Metabolism of Aromatic Compounds	Benzoate transport and degradation cluster	-	Benzoate transport, inner-membrane translocator precursor	2	-20	62.02	79	2
GoM278	Metabolism of Aromatic Compounds	Benzoate transport and degradation cluster	-	Benzoate-CoA ligase (EC 6.2.1.25)	4	-12.75	64.24	55.75	4
GoM278	Metabolism of Aromatic Compounds	Benzoate transport and degradation cluster	-	Benzoyl-CoA oxygenase component B	5	-38	73.42	96.4	5
GoM278	Metabolism of Aromatic Compounds	Benzoate transport and degradation cluster	-	benzoyl-CoA-dihydrodiol lyase (BoxC)	4	-32	68.86	93.67	3
GoM278	Metabolism of Aromatic Compounds	Benzoate transport and degradation cluster	-	Methylglutaconyl-CoA hydratase (EC 4.2.1.18)	6	-12.17	67.35	57.67	6
GoM278	Metabolism of Aromatic Compounds	Benzoate transport and degradation cluster	-	Shikimate kinase I (EC 2.7.1.71)	12	-14.25	64.87	60.17	12
GoM278	Metabolism of Aromatic Compounds	carbazol degradation cluster	-	2-hydroxy-6-oxo-6-phenylhexa-2,4-dienoate hydrolase (EC 3.7.1.-)	1	-32	65.35	101	1
GoM278	Metabolism of Aromatic Compounds	carbazol degradation cluster	-	4-hydroxy-2-oxovalerate aldolase (EC 4.1.3.-)	3	-23.33	69.8	71.33	2
GoM278	Metabolism of Aromatic Compounds	Gentisare degradation	-	Fumarylacetoacetate hydrolase family protein	11	-19.27	68.73	66.64	11
GoM278	Metabolism of Aromatic Compounds	Gentisare degradation	-	putative 4-hydroxybenzoyl-CoA thioesterase	1	-35	60.17	118	1
GoM278	Metabolism of Aromatic Compounds	Metabolism of central aromatic intermediates	4-Hydroxyphenylacetic acid catabolic pathway	2-hydroxyhepta-2,4-diene-1,7-dioate isomerase (EC 5.3.3.-)	6	-14.5	67.43	54.67	4
GoM278	Metabolism of Aromatic Compounds	Metabolism of central aromatic intermediates	4-Hydroxyphenylacetic acid catabolic pathway	4-hydroxyphenylacetate 3-monooxygenase (EC 1.14.13.3)	7	-16.6	77.28	53.8	7
GoM278	Metabolism of Aromatic Compounds	Metabolism of central aromatic intermediates	4-Hydroxyphenylacetic acid catabolic pathway	5-carboxymethyl-2-hydroxymuconate semialdehyde dehydrogenase (EC 1.2.1.60)	3	-18.67	70.93	61.33	3
GoM278	Metabolism of Aromatic Compounds	Metabolism of central aromatic intermediates	Catechol branch of beta-ketoadipate pathway	3-oxoadipate CoA-transferase subunit B (EC 2.8.3.6)	3	-20.67	70.79	66.33	3
GoM278	Metabolism of Aromatic Compounds	Metabolism of central aromatic intermediates	Catechol branch of beta-ketoadipate pathway	Beta-ketoadipate enol-lactone hydrolase (EC 3.1.1.24)	6	-17.67	63.32	67.17	6
GoM278	Metabolism of Aromatic Compounds	Metabolism of central aromatic intermediates	Catechol branch of beta-ketoadipate pathway	Muconate cycloisomerase (EC 5.5.1.1)	2	-15.5	70.58	66	2
GoM278	Metabolism of Aromatic Compounds	Metabolism of central aromatic intermediates	Catechol branch of beta-ketoadipate pathway	Succinyl-CoA:3-ketoacid-coenzyme A transferase subunit B (EC 2.8.3.5)	1	-50	74.22	128	1
GoM278	Metabolism of Aromatic Compounds	Metabolism of central aromatic intermediates	Central meta-cleavage pathway of aromatic compound degradation	2-hydroxy-6-oxo-6-phenylhexa-2,4-dienoate hydrolase (EC 3.7.1.-)	1	-32	65.35	101	1
GoM278	Metabolism of Aromatic Compounds	Metabolism of central aromatic intermediates	Central meta-cleavage pathway of aromatic compound degradation	4-oxalocrotonate tautomerase (EC 5.3.2.-)	2	-17.5	75.96	56	2
GoM278	Metabolism of Aromatic Compounds	Metabolism of central aromatic intermediates	Central meta-cleavage pathway of aromatic compound degradation	5-carboxymethyl-2-hydroxymuconate semialdehyde dehydrogenase (EC 1.2.1.60)	3	-18.67	70.93	61.33	3
GoM278	Metabolism of Aromatic Compounds	Metabolism of central aromatic intermediates	Homogentisate pathway of aromatic compound degradation	4-hydroxyphenylpyruvate dioxygenase (EC 1.13.11.27)	3	-43.33	72.04	117.33	3
GoM278	Metabolism of Aromatic Compounds	Metabolism of central aromatic intermediates	Homogentisate pathway of aromatic compound degradation	Aromatic-amino-acid aminotransferase (EC 2.6.1.57)	1	-7	58.82	51	1
GoM278	Metabolism of Aromatic Compounds	Metabolism of central aromatic intermediates	Homogentisate pathway of aromatic compound degradation	Fumarylacetoacetase (EC 3.7.1.2)	7	-15.57	71.72	54	7
GoM278	Metabolism of Aromatic Compounds	Metabolism of central aromatic intermediates	Homogentisate pathway of aromatic compound degradation	Homogentisate 1,2-dioxygenase (EC 1.13.11.5)	3	-36	69.47	95.33	3
GoM278	Metabolism of Aromatic Compounds	Metabolism of central aromatic intermediates	N-heterocyclic aromatic compound degradation	Isoquinoline 1-oxidoreductase alpha subunit (EC 1.3.99.16)	4	-20.5	59.12	74	4
GoM278	Metabolism of Aromatic Compounds	Metabolism of central aromatic intermediates	Protocatechuate branch of beta-ketoadipate pathway	3-oxoadipate CoA-transferase subunit B (EC 2.8.3.6)	3	-20.67	70.79	66.33	3
GoM278	Metabolism of Aromatic Compounds	Metabolism of central aromatic intermediates	Protocatechuate branch of beta-ketoadipate pathway	Beta-ketoadipate enol-lactone hydrolase (EC 3.1.1.24)	6	-17.67	63.32	67.17	6
GoM278	Metabolism of Aromatic Compounds	Metabolism of central aromatic intermediates	Protocatechuate branch of beta-ketoadipate pathway	Beta-ketoadipyl CoA thiolase (EC 2.3.1.-)	2	-23.5	67.42	75.5	2
GoM278	Metabolism of Aromatic Compounds	Metabolism of central aromatic intermediates	Protocatechuate branch of beta-ketoadipate pathway	Succinyl-CoA:3-ketoacid-coenzyme A transferase subunit B (EC 2.8.3.5)	1	-50	74.22	128	1
GoM278	Metabolism of Aromatic Compounds	Metabolism of central aromatic intermediates	Salicylate and gentisate catabolism	Fumarylacetoacetase (EC 3.7.1.2)	7	-15.57	71.72	54	7
GoM278	Metabolism of Aromatic Compounds	Metabolism of central aromatic intermediates	Salicylate and gentisate catabolism	Fumarylacetoacetate hydrolase family protein	11	-19.27	68.73	66.64	11
GoM278	Metabolism of Aromatic Compounds	Metabolism of central aromatic intermediates	Salicylate and gentisate catabolism	Maleate cis-trans isomerase (EC 5.2.1.1)	1	-20	60.76	79	1
GoM278	Metabolism of Aromatic Compounds	Peripheral pathways for catabolism of aromatic compounds	Benzoate catabolism	Acetyl-CoA C-acyltransferase (EC 2.3.1.16)	4	-36.5	66.94	108.75	4
GoM278	Metabolism of Aromatic Compounds	Peripheral pathways for catabolism of aromatic compounds	Benzoate catabolism	Muconate cycloisomerase (EC 5.5.1.1)	2	-15.5	70.58	66	2
GoM278	Metabolism of Aromatic Compounds	Peripheral pathways for catabolism of aromatic compounds	Benzoate degradation	Benzoate 1,2-dioxygenase alpha subunit (EC 1.14.12.10)	1	-21	69.12	68	1
GoM278	Metabolism of Aromatic Compounds	Peripheral pathways for catabolism of aromatic compounds	Benzoate degradation	Benzoate transport protein	3	-15	61.95	66	3
GoM278	Metabolism of Aromatic Compounds	Peripheral pathways for catabolism of aromatic compounds	Biphenyl Degradation	2-hydroxy-6-oxo-6-phenylhexa-2,4-dienoate hydrolase (EC 3.7.1.-)	1	-32	65.35	101	1
GoM278	Metabolism of Aromatic Compounds	Peripheral pathways for catabolism of aromatic compounds	Biphenyl Degradation	4-hydroxy-2-oxovalerate aldolase (EC 4.1.3.-)	3	-23.33	69.8	71.33	2
GoM278	Metabolism of Aromatic Compounds	Peripheral pathways for catabolism of aromatic compounds	Biphenyl Degradation	Acetaldehyde dehydrogenase (EC 1.2.1.10)	5	-14.6	70.48	56	5
GoM278	Metabolism of Aromatic Compounds	Peripheral pathways for catabolism of aromatic compounds	Chloroaromatic degradation pathway	3-oxoadipate CoA-transferase subunit B (EC 2.8.3.6)	3	-20.67	70.79	66.33	3
GoM278	Metabolism of Aromatic Compounds	Peripheral pathways for catabolism of aromatic compounds	Chloroaromatic degradation pathway	Beta-ketoadipate enol-lactone hydrolase (EC 3.1.1.24)	6	-17.67	63.32	67.17	6
GoM278	Metabolism of Aromatic Compounds	Peripheral pathways for catabolism of aromatic compounds	Chloroaromatic degradation pathway	Beta-ketoadipyl CoA thiolase (EC 2.3.1.-)	2	-23.5	67.42	75.5	2
GoM278	Metabolism of Aromatic Compounds	Peripheral pathways for catabolism of aromatic compounds	Chlorobenzoate degradation	Muconate cycloisomerase (EC 5.5.1.1)	2	-15.5	70.58	66	2
GoM278	Metabolism of Aromatic Compounds	Peripheral pathways for catabolism of aromatic compounds	Naphtalene and antracene degradation	2-hydroxychromene-2-carboxylate isomerase	3	-11.33	64.09	50.33	3
GoM278	Metabolism of Aromatic Compounds	Peripheral pathways for catabolism of aromatic compounds	Naphtalene and antracene degradation	ferredoxin subunit aromatic oxygenase	1	-31	66.32	95	1
GoM278	Metabolism of Aromatic Compounds	Peripheral pathways for catabolism of aromatic compounds	n-Phenylalkanoic acid degradation	3-hydroxyacyl-CoA dehydrogenase (EC 1.1.1.35)	53	-14	70.4	55	48
GoM278	Metabolism of Aromatic Compounds	Peripheral pathways for catabolism of aromatic compounds	n-Phenylalkanoic acid degradation	3-hydroxybutyryl-CoA epimerase (EC 5.1.2.3)	25	-13.32	67.74	56.36	24
GoM278	Metabolism of Aromatic Compounds	Peripheral pathways for catabolism of aromatic compounds	n-Phenylalkanoic acid degradation	3-ketoacyl-CoA thiolase (EC 2.3.1.16)	37	-24.63	69.21	81.16	35
GoM278	Metabolism of Aromatic Compounds	Peripheral pathways for catabolism of aromatic compounds	n-Phenylalkanoic acid degradation	Delta(3)-cis-delta(2)-trans-enoyl-CoA isomerase (EC 5.3.3.8)	19	-16.89	68.06	63.72	18
GoM278	Metabolism of Aromatic Compounds	Peripheral pathways for catabolism of aromatic compounds	n-Phenylalkanoic acid degradation	Enoyl-CoA hydratase (EC 4.2.1.17)	64	-16.2	67.54	61.59	63
GoM278	Metabolism of Aromatic Compounds	Peripheral pathways for catabolism of aromatic compounds	n-Phenylalkanoic acid degradation	Long-chain-fatty-acid--CoA ligase (EC 6.2.1.3)	140	-16.17	67.14	60.83	140
GoM278	Metabolism of Aromatic Compounds	Peripheral pathways for catabolism of aromatic compounds	Phenylpropanoid compound degradation	Phenylpropionate dioxygenase and related ring-hydroxylating dioxygenases, large terminal subunit	3	-34	63.7	101.67	3
GoM278	Metabolism of Aromatic Compounds	Peripheral pathways for catabolism of aromatic compounds	Phenylpropanoid compound degradation	Probable vanillate O-demethylase oxygenase subunit oxidoreductase protein (EC 1.14.13.-)	1	-18	59.09	66	1
GoM278	Metabolism of Aromatic Compounds	Peripheral pathways for catabolism of aromatic compounds	Phenylpropanoid compound degradation	Probable VANILLIN dehydrogenase oxidoreductase protein (EC 1.-.-.-)	1	-12	54.84	62	1
GoM278	Metabolism of Aromatic Compounds	Peripheral pathways for catabolism of aromatic compounds	Phenylpropanoid compound degradation	Putative phthalate 4,5-dioxygenase oxygenase subunit (OhpA2)	1	-21	67.14	70	1
GoM278	Metabolism of Aromatic Compounds	Peripheral pathways for catabolism of aromatic compounds	Phenylpropanoid compound degradation	Vanillate O-demethylase oxidoreductase (EC 1.14.13.-)	3	-19.33	63.37	72.33	2
GoM278	Metabolism of Aromatic Compounds	Peripheral pathways for catabolism of aromatic compounds	p-Hydroxybenzoate degradation	P-hydroxybenzoate hydroxylase (EC 1.14.13.2)	1	-39	78.02	91	1
GoM278	Metabolism of Aromatic Compounds	Peripheral pathways for catabolism of aromatic compounds	Quinate degradation	3-dehydroquinate dehydratase II (EC 4.2.1.10)	7	-17.57	70.22	63.57	7
GoM278	Metabolism of Aromatic Compounds	Phenylacetyl-CoA catabolic pathway (core)	-	3-hydroxyacyl-CoA dehydrogenase PaaC (EC 1.1.1.-)	1	-35	63.96	111	1
GoM278	Metabolism of Aromatic Compounds	Phenylacetyl-CoA catabolic pathway (core)	-	Phenylacetate degradation enoyl-CoA hydratase PaaB (EC 4.2.1.17)	2	-31	66.83	102	2
GoM278	Metabolism of Aromatic Compounds	Phenylacetyl-CoA catabolic pathway (core)	-	Phenylacetate-CoA oxygenase, PaaG subunit	3	-24.33	68.23	73	3
GoM278	Metabolism of Aromatic Compounds	Phenylacetyl-CoA catabolic pathway (core)	-	Phenylacetate-CoA oxygenase/reductase, PaaK subunit	4	-18.75	64.91	66.75	4
GoM278	Metabolism of Aromatic Compounds	Phenylacetyl-CoA catabolic pathway (core)	-	Phenylacetic acid degradation protein PaaN, ring-opening aldehyde dehydrogenase (EC 1.2.1.3)	3	-13.67	58.05	65.33	3
GoM315	Metabolism of Aromatic Compounds	Anaerobic degradation of aromatic compounds	Anaerobic benzoate metabolism	2-ketocyclohexanecarboxyl-CoA hydrolase (EC 4.1.3.36)	2	-13.5	68.3	52	2
GoM315	Metabolism of Aromatic Compounds	Anaerobic degradation of aromatic compounds	Anaerobic benzoate metabolism	3-hydroxybutyryl-CoA dehydrogenase (EC 1.1.1.157)	13	-20.85	69.9	70.77	13
GoM315	Metabolism of Aromatic Compounds	Anaerobic degradation of aromatic compounds	Anaerobic benzoate metabolism	Acetyl-CoA acetyltransferase (EC 2.3.1.9)	62	-20.55	68.3	72.39	58
GoM315	Metabolism of Aromatic Compounds	Anaerobic degradation of aromatic compounds	Anaerobic benzoate metabolism	Benzoyl-CoA reductase subunit BadD (EC 1.3.99.15)	3	-16.5	71.7	53	2
GoM315	Metabolism of Aromatic Compounds	Anaerobic degradation of aromatic compounds	Anaerobic benzoate metabolism	Benzoyl-CoA reductase subunit BadE (EC 1.3.99.15)	6	-27.83	71.71	79.5	5
GoM315	Metabolism of Aromatic Compounds	Anaerobic degradation of aromatic compounds	Anaerobic benzoate metabolism	Benzoyl-CoA reductase subunit BadF (EC 1.3.99.15)	5	-24.6	75.22	74.4	2
GoM315	Metabolism of Aromatic Compounds	Anaerobic degradation of aromatic compounds	Anaerobic benzoate metabolism	Benzoyl-CoA reductase subunit BadG (EC 1.3.99.15)	12	-25.85	70.68	80.31	12
GoM315	Metabolism of Aromatic Compounds	Anaerobic degradation of aromatic compounds	Anaerobic benzoate metabolism	Glutaryl-CoA dehydrogenase (EC 1.3.99.7)	17	-26.5	71.12	80.56	15
GoM315	Metabolism of Aromatic Compounds	Anaerobic degradation of aromatic compounds	Anaerobic toluene and ethylbenzene degradation	Ethylbenzene dehydrogenase beta subunit (EC 1.17.99.2)	1	-10	55.93	59	1
GoM315	Metabolism of Aromatic Compounds	Anaerobic degradation of aromatic compounds	Hydroxyaromatic decarboxylase family	Hydroxyaromatic non-oxidative decarboxylase protein B (EC 4.1.1.-)	1	-25	62.79	86	1
GoM315	Metabolism of Aromatic Compounds	Aromatic Amin Catabolism	-	4-hydroxyphenylacetate 3-monooxygenase (EC 1.14.13.3)	4	-16.4	71.23	57.8	4
GoM315	Metabolism of Aromatic Compounds	Aromatic Amin Catabolism	-	Aldehyde dehydrogenase (EC 1.2.1.3), PaaZ	1	-12	66	50	1
GoM315	Metabolism of Aromatic Compounds	Aromatic Amin Catabolism	-	Monoamine oxidase (1.4.3.4)	1	-37	67.65	102	1
GoM315	Metabolism of Aromatic Compounds	Aromatic Amin Catabolism	-	Nitrilotriacetate monooxygenase component B (EC 1.14.13.-)	3	-18	68.65	62.67	3
GoM315	Metabolism of Aromatic Compounds	Benzoate transport and degradation cluster	-	2-keto-4-pentenoate hydratase/2-oxohepta-3-ene-1,7-dioic acid hydratase (catechol pathway)	1	-58	64.1	156	1
GoM315	Metabolism of Aromatic Compounds	Benzoate transport and degradation cluster	-	Benzoate transport, inner-membrane translocator	2	-12	62.15	58	2
GoM315	Metabolism of Aromatic Compounds	Benzoate transport and degradation cluster	-	Benzoate transport, inner-membrane translocator precursor	1	-22	53.93	89	1
GoM315	Metabolism of Aromatic Compounds	Benzoate transport and degradation cluster	-	Benzoyl-CoA oxygenase component B	1	-72	78.05	164	1
GoM315	Metabolism of Aromatic Compounds	Benzoate transport and degradation cluster	-	benzoyl-CoA-dihydrodiol lyase (BoxC)	2	-25.5	68.54	79	2
GoM315	Metabolism of Aromatic Compounds	Benzoate transport and degradation cluster	-	Methylglutaconyl-CoA hydratase (EC 4.2.1.18)	10	-14.64	69.14	59.45	10
GoM315	Metabolism of Aromatic Compounds	Benzoate transport and degradation cluster	-	Regulatory protein of benzoate catabolism	1	-10	60	55	1
GoM315	Metabolism of Aromatic Compounds	Benzoate transport and degradation cluster	-	Shikimate kinase I (EC 2.7.1.71)	10	-15.8	60.22	70.3	9
GoM315	Metabolism of Aromatic Compounds	carbazol degradation cluster	-	2-hydroxy-6-oxo-6-phenylhexa-2,4-dienoate hydrolase (EC 3.7.1.-)	2	-29.5	72.36	81	2
GoM315	Metabolism of Aromatic Compounds	Cresol degradation	-	4-cresol dehydrogenase [hydroxylating] flavoprotein subunit (EC 1.17.99.1)	1	-15	58.06	62	1
GoM315	Metabolism of Aromatic Compounds	Gentisare degradation	-	Fumarylacetoacetate hydrolase family protein	9	-18.33	66.52	66.78	9
GoM315	Metabolism of Aromatic Compounds	Gentisare degradation	-	Gentisate 1,2-dioxygenase (EC 1.13.11.4)	2	-23.5	62.5	76	2
GoM315	Metabolism of Aromatic Compounds	Gentisare degradation	-	Maleylacetoacetate isomerase (EC 5.2.1.2)	2	-6.5	58.17	50	2
GoM315	Metabolism of Aromatic Compounds	Gentisare degradation	-	putative 4-hydroxybenzoyl-CoA thioesterase	1	-19	58.57	70	1
GoM315	Metabolism of Aromatic Compounds	Metabolism of central aromatic intermediates	4-Hydroxyphenylacetic acid catabolic pathway	2,4-dihydroxyhept-2-ene-1,7-dioic acid aldolase (EC 4.1.2.-)	4	-16.5	66.65	64	4
GoM315	Metabolism of Aromatic Compounds	Metabolism of central aromatic intermediates	4-Hydroxyphenylacetic acid catabolic pathway	2-hydroxyhepta-2,4-diene-1,7-dioate isomerase (EC 5.3.3.-)	3	-29	75.63	81	3
GoM315	Metabolism of Aromatic Compounds	Metabolism of central aromatic intermediates	4-Hydroxyphenylacetic acid catabolic pathway	4-hydroxyphenylacetate 3-monooxygenase (EC 1.14.13.3)	4	-16.4	71.23	57.8	4
GoM315	Metabolism of Aromatic Compounds	Metabolism of central aromatic intermediates	4-Hydroxyphenylacetic acid catabolic pathway	5-carboxymethyl-2-hydroxymuconate semialdehyde dehydrogenase (EC 1.2.1.60)	2	-15.5	68.44	59.5	2
GoM315	Metabolism of Aromatic Compounds	Metabolism of central aromatic intermediates	4-Hydroxyphenylacetic acid catabolic pathway	5-carboxymethyl-2-oxo-hex-3- ene-1,7-dioate decarboxylase (EC 4.1.1.68)	5	-19.4	74.6	61.4	5
GoM315	Metabolism of Aromatic Compounds	Metabolism of central aromatic intermediates	Catechol branch of beta-ketoadipate pathway	3-oxoadipate CoA-transferase subunit A (EC 2.8.3.6)	9	-15.89	67.47	60.44	9
GoM315	Metabolism of Aromatic Compounds	Metabolism of central aromatic intermediates	Catechol branch of beta-ketoadipate pathway	3-oxoadipate CoA-transferase subunit B (EC 2.8.3.6)	4	-19.5	63.75	74.5	4
GoM315	Metabolism of Aromatic Compounds	Metabolism of central aromatic intermediates	Catechol branch of beta-ketoadipate pathway	Beta-ketoadipate enol-lactone hydrolase (EC 3.1.1.24)	10	-11.45	63.33	55.45	10
GoM315	Metabolism of Aromatic Compounds	Metabolism of central aromatic intermediates	Catechol branch of beta-ketoadipate pathway	mandelate racemase/muconate lactonizing enzyme family protein	9	-15.8	68.14	60.2	9
GoM315	Metabolism of Aromatic Compounds	Metabolism of central aromatic intermediates	Catechol branch of beta-ketoadipate pathway	Muconate cycloisomerase (EC 5.5.1.1)	5	-18.6	66.87	65.6	5
GoM315	Metabolism of Aromatic Compounds	Metabolism of central aromatic intermediates	Catechol branch of beta-ketoadipate pathway	Muconolactone isomerase (EC 5.3.3.4)	1	-27	71.25	80	1
GoM315	Metabolism of Aromatic Compounds	Metabolism of central aromatic intermediates	Catechol branch of beta-ketoadipate pathway	Muconolactone isomerase (EC 5.3.3.4),putative	1	-27	71.25	80	1
GoM315	Metabolism of Aromatic Compounds	Metabolism of central aromatic intermediates	Catechol branch of beta-ketoadipate pathway	Succinyl-CoA:3-ketoacid-coenzyme A transferase subunit A (EC 2.8.3.5)	4	-32.75	67.26	100.75	3
GoM315	Metabolism of Aromatic Compounds	Metabolism of central aromatic intermediates	Catechol branch of beta-ketoadipate pathway	Succinyl-CoA:3-ketoacid-coenzyme A transferase subunit B (EC 2.8.3.5)	4	-40.25	77.52	105	3
GoM315	Metabolism of Aromatic Compounds	Metabolism of central aromatic intermediates	Central meta-cleavage pathway of aromatic compound degradation	2-hydroxy-6-oxo-6-phenylhexa-2,4-dienoate hydrolase (EC 3.7.1.-)	2	-29.5	72.36	81	2
GoM315	Metabolism of Aromatic Compounds	Metabolism of central aromatic intermediates	Central meta-cleavage pathway of aromatic compound degradation	2-hydroxymuconic semialdehyde hydrolase (EC 3.7.1.9)	1	-15.67	70.27	55.33	1
GoM315	Metabolism of Aromatic Compounds	Metabolism of central aromatic intermediates	Central meta-cleavage pathway of aromatic compound degradation	4-oxalocrotonate tautomerase (EC 5.3.2.-)	1	-19	77.97	59	1
GoM315	Metabolism of Aromatic Compounds	Metabolism of central aromatic intermediates	Central meta-cleavage pathway of aromatic compound degradation	5-carboxymethyl-2-hydroxymuconate semialdehyde dehydrogenase (EC 1.2.1.60)	2	-15.5	68.44	59.5	2
GoM315	Metabolism of Aromatic Compounds	Metabolism of central aromatic intermediates	Central meta-cleavage pathway of aromatic compound degradation	Protocatechuate 4,5-dioxygenase alpha chain (EC 1.13.11.8)	2	-23.5	64.13	81.5	2
GoM315	Metabolism of Aromatic Compounds	Metabolism of central aromatic intermediates	Homogentisate pathway of aromatic compound degradation	4-hydroxyphenylpyruvate dioxygenase (EC 1.13.11.27)	12	-29	70.97	86	12
GoM315	Metabolism of Aromatic Compounds	Metabolism of central aromatic intermediates	Homogentisate pathway of aromatic compound degradation	Aromatic-amino-acid aminotransferase (EC 2.6.1.57)	1	-37	61.32	106	1
GoM315	Metabolism of Aromatic Compounds	Metabolism of central aromatic intermediates	Homogentisate pathway of aromatic compound degradation	Fumarylacetoacetase (EC 3.7.1.2)	2	-27	75.15	75.5	2
GoM315	Metabolism of Aromatic Compounds	Metabolism of central aromatic intermediates	Homogentisate pathway of aromatic compound degradation	Maleylacetoacetate isomerase (EC 5.2.1.2)	2	-6.5	58.17	50	2
GoM315	Metabolism of Aromatic Compounds	Metabolism of central aromatic intermediates	Homogentisate pathway of aromatic compound degradation	Transcriptional regulator, IclR family	7	-17.71	74.05	61.43	7
GoM315	Metabolism of Aromatic Compounds	Metabolism of central aromatic intermediates	N-heterocyclic aromatic compound degradation	Isoquinoline 1-oxidoreductase alpha subunit (EC 1.3.99.16)	3	-30.33	65.06	91.67	3
GoM315	Metabolism of Aromatic Compounds	Metabolism of central aromatic intermediates	N-heterocyclic aromatic compound degradation	Isoquinoline 1-oxidoreductase beta subunit (EC 1.3.99.16)	17	-13.25	63.7	58	16
GoM315	Metabolism of Aromatic Compounds	Metabolism of central aromatic intermediates	Protocatechuate branch of beta-ketoadipate pathway	3-oxoadipate CoA-transferase subunit A (EC 2.8.3.6)	9	-15.89	67.47	60.44	9
GoM315	Metabolism of Aromatic Compounds	Metabolism of central aromatic intermediates	Protocatechuate branch of beta-ketoadipate pathway	3-oxoadipate CoA-transferase subunit B (EC 2.8.3.6)	4	-19.5	63.75	74.5	4
GoM315	Metabolism of Aromatic Compounds	Metabolism of central aromatic intermediates	Protocatechuate branch of beta-ketoadipate pathway	Beta-ketoadipate enol-lactone hydrolase (EC 3.1.1.24)	10	-11.45	63.33	55.45	10
GoM315	Metabolism of Aromatic Compounds	Metabolism of central aromatic intermediates	Protocatechuate branch of beta-ketoadipate pathway	Beta-ketoadipyl CoA thiolase (EC 2.3.1.-)	8	-23.44	68.17	81.89	8
GoM315	Metabolism of Aromatic Compounds	Metabolism of central aromatic intermediates	Protocatechuate branch of beta-ketoadipate pathway	Protocatechuate 3,4-dioxygenase beta chain (EC 1.13.11.3)	3	-16.33	67.57	65.33	3
GoM315	Metabolism of Aromatic Compounds	Metabolism of central aromatic intermediates	Protocatechuate branch of beta-ketoadipate pathway	Succinyl-CoA:3-ketoacid-coenzyme A transferase subunit A (EC 2.8.3.5)	4	-32.75	67.26	100.75	3
GoM315	Metabolism of Aromatic Compounds	Metabolism of central aromatic intermediates	Protocatechuate branch of beta-ketoadipate pathway	Succinyl-CoA:3-ketoacid-coenzyme A transferase subunit B (EC 2.8.3.5)	4	-40.25	77.52	105	3
GoM315	Metabolism of Aromatic Compounds	Metabolism of central aromatic intermediates	Salicylate and gentisate catabolism	Fumarylacetoacetase (EC 3.7.1.2)	2	-27	75.15	75.5	2
GoM315	Metabolism of Aromatic Compounds	Metabolism of central aromatic intermediates	Salicylate and gentisate catabolism	Fumarylacetoacetate hydrolase family protein	9	-18.33	66.52	66.78	9
GoM315	Metabolism of Aromatic Compounds	Metabolism of central aromatic intermediates	Salicylate and gentisate catabolism	Gentisate 1,2-dioxygenase (EC 1.13.11.4)	2	-23.5	62.5	76	2
GoM315	Metabolism of Aromatic Compounds	Metabolism of central aromatic intermediates	Salicylate and gentisate catabolism	Maleate cis-trans isomerase (EC 5.2.1.1)	1	-11	59.26	54	1
GoM315	Metabolism of Aromatic Compounds	Metabolism of central aromatic intermediates	Salicylate and gentisate catabolism	Maleylacetoacetate isomerase (EC 5.2.1.2)	2	-6.5	58.17	50	2
GoM315	Metabolism of Aromatic Compounds	Peripheral pathways for catabolism of aromatic compounds	Benzoate catabolism	Acetyl-CoA C-acyltransferase (EC 2.3.1.16)	4	-28.25	70.33	86.75	3
GoM315	Metabolism of Aromatic Compounds	Peripheral pathways for catabolism of aromatic compounds	Benzoate catabolism	Benzoate 1,2-dioxygenase (EC 1.14.12.10)	2	-11	59.98	50.5	2
GoM315	Metabolism of Aromatic Compounds	Peripheral pathways for catabolism of aromatic compounds	Benzoate catabolism	Muconate cycloisomerase (EC 5.5.1.1)	5	-18.6	66.87	65.6	5
GoM315	Metabolism of Aromatic Compounds	Peripheral pathways for catabolism of aromatic compounds	Benzoate catabolism	Muconolactone isomerase (EC 5.3.3.4)	1	-27	71.25	80	1
GoM315	Metabolism of Aromatic Compounds	Peripheral pathways for catabolism of aromatic compounds	Benzoate degradation	Benzoylformate decarboxylase (EC 4.1.1.7)	5	-29.5	69.35	85.5	3
GoM315	Metabolism of Aromatic Compounds	Peripheral pathways for catabolism of aromatic compounds	Benzoate degradation	Ortho-halobenzoate 1,2-dioxygenase alpha-ISP protein OhbB	1	-21	56.79	81	1
GoM315	Metabolism of Aromatic Compounds	Peripheral pathways for catabolism of aromatic compounds	Benzoate degradation	Ring hydroxylating dioxygenase, alpha subunit (EC 1.14.12.13)	1	-25	68.75	80	1
GoM315	Metabolism of Aromatic Compounds	Peripheral pathways for catabolism of aromatic compounds	Biphenyl Degradation	2-hydroxy-6-oxo-6-phenylhexa-2,4-dienoate hydrolase (EC 3.7.1.-)	2	-29.5	72.36	81	2
GoM315	Metabolism of Aromatic Compounds	Peripheral pathways for catabolism of aromatic compounds	Biphenyl Degradation	2-keto-4-pentenoate hydratase (EC 4.2.1.-)	2	-18.5	71.59	66	2
GoM315	Metabolism of Aromatic Compounds	Peripheral pathways for catabolism of aromatic compounds	Chloroaromatic degradation pathway	3-oxoadipate CoA-transferase subunit A (EC 2.8.3.6)	9	-15.89	67.47	60.44	9
GoM315	Metabolism of Aromatic Compounds	Peripheral pathways for catabolism of aromatic compounds	Chloroaromatic degradation pathway	3-oxoadipate CoA-transferase subunit B (EC 2.8.3.6)	4	-19.5	63.75	74.5	4
GoM315	Metabolism of Aromatic Compounds	Peripheral pathways for catabolism of aromatic compounds	Chloroaromatic degradation pathway	Beta-ketoadipate enol-lactone hydrolase (EC 3.1.1.24)	10	-11.45	63.33	55.45	10
GoM315	Metabolism of Aromatic Compounds	Peripheral pathways for catabolism of aromatic compounds	Chloroaromatic degradation pathway	Beta-ketoadipyl CoA thiolase (EC 2.3.1.-)	8	-23.44	68.17	81.89	8
GoM315	Metabolism of Aromatic Compounds	Peripheral pathways for catabolism of aromatic compounds	Chlorobenzoate degradation	Muconate cycloisomerase (EC 5.5.1.1)	5	-18.6	66.87	65.6	5
GoM315	Metabolism of Aromatic Compounds	Peripheral pathways for catabolism of aromatic compounds	n-Phenylalkanoic acid degradation	3-hydroxyacyl-CoA dehydrogenase (EC 1.1.1.35)	60	-16.73	66.9	64.56	51
GoM315	Metabolism of Aromatic Compounds	Peripheral pathways for catabolism of aromatic compounds	n-Phenylalkanoic acid degradation	3-hydroxybutyryl-CoA epimerase (EC 5.1.2.3)	19	-13.44	64.24	59.5	15
GoM315	Metabolism of Aromatic Compounds	Peripheral pathways for catabolism of aromatic compounds	n-Phenylalkanoic acid degradation	3-ketoacyl-CoA thiolase (EC 2.3.1.16)	49	-19.19	68.64	68.15	49
GoM315	Metabolism of Aromatic Compounds	Peripheral pathways for catabolism of aromatic compounds	n-Phenylalkanoic acid degradation	Delta(3)-cis-delta(2)-trans-enoyl-CoA isomerase (EC 5.3.3.8)	15	-14.77	66.1	60.85	11
GoM315	Metabolism of Aromatic Compounds	Peripheral pathways for catabolism of aromatic compounds	n-Phenylalkanoic acid degradation	Enoyl-CoA hydratase (EC 4.2.1.17)	70	-12.89	66.37	55.85	70
GoM315	Metabolism of Aromatic Compounds	Peripheral pathways for catabolism of aromatic compounds	n-Phenylalkanoic acid degradation	Long-chain-fatty-acid--CoA ligase (EC 6.2.1.3)	161	-16.15	66.49	61.71	154
GoM315	Metabolism of Aromatic Compounds	Peripheral pathways for catabolism of aromatic compounds	Phenylpropanoid compound degradation	3-hydroxyphenylpropionic acid transporter	1	-6	53.85	52	1
GoM315	Metabolism of Aromatic Compounds	Peripheral pathways for catabolism of aromatic compounds	Phenylpropanoid compound degradation	Lignostilbene-alpha,beta-dioxygenase and related enzymes	2	-17.5	60.42	65.5	2
GoM315	Metabolism of Aromatic Compounds	Peripheral pathways for catabolism of aromatic compounds	Phenylpropanoid compound degradation	Probable VANILLIN dehydrogenase oxidoreductase protein (EC 1.-.-.-)	2	-12.5	54.04	69	2
GoM315	Metabolism of Aromatic Compounds	Peripheral pathways for catabolism of aromatic compounds	Phenylpropanoid compound degradation	Putative phthalate 4,5-dioxygenase oxygenase subunit (OhpA2)	1	-16	59.38	64	1
GoM315	Metabolism of Aromatic Compounds	Peripheral pathways for catabolism of aromatic compounds	Phenylpropanoid compound degradation	Vanillate O-demethylase oxygenase subunit (EC 1.14.13.82)	1	-14	62.26	53	1
GoM315	Metabolism of Aromatic Compounds	Peripheral pathways for catabolism of aromatic compounds	Quinate degradation	3-dehydroquinate dehydratase I (EC 4.2.1.10)	1	-19	65.62	64	1
GoM315	Metabolism of Aromatic Compounds	Peripheral pathways for catabolism of aromatic compounds	Quinate degradation	3-dehydroquinate dehydratase II (EC 4.2.1.10)	7	-17.14	64.15	67.71	7
GoM315	Metabolism of Aromatic Compounds	Peripheral pathways for catabolism of aromatic compounds	Quinate degradation	Quinate/shikimate dehydrogenase [Pyrroloquinoline-quinone] (EC 1.1.99.25)	3	-19.67	70.19	63	1
GoM315	Metabolism of Aromatic Compounds	Phenylacetyl-CoA catabolic pathway (core)	-	3-hydroxyacyl-CoA dehydrogenase PaaC (EC 1.1.1.-)	6	-34.6	71.94	95.6	5
GoM315	Metabolism of Aromatic Compounds	Phenylacetyl-CoA catabolic pathway (core)	-	Acetate permease ActP (cation/acetate symporter) PaaL	2	-20	55.89	83	2
GoM315	Metabolism of Aromatic Compounds	Phenylacetyl-CoA catabolic pathway (core)	-	Aldehyde dehydrogenase (EC 1.2.1.3), PaaZ	1	-12	66	50	1
GoM315	Metabolism of Aromatic Compounds	Phenylacetyl-CoA catabolic pathway (core)	-	Phenylacetate degradation enoyl-CoA hydratase PaaA (EC 4.2.1.17)	4	-13.5	61.43	63	4
GoM315	Metabolism of Aromatic Compounds	Phenylacetyl-CoA catabolic pathway (core)	-	Phenylacetate-CoA oxygenase, PaaG subunit	3	-18.33	72.72	57.33	3
GoM315	Metabolism of Aromatic Compounds	Phenylacetyl-CoA catabolic pathway (core)	-	Phenylacetate-CoA oxygenase, PaaI subunit	4	-28.33	68.72	87.33	3
GoM315	Metabolism of Aromatic Compounds	Phenylacetyl-CoA catabolic pathway (core)	-	Phenylacetate-CoA oxygenase/reductase, PaaK subunit	1	-8	55.77	52	1
GoM315	Metabolism of Aromatic Compounds	Phenylacetyl-CoA catabolic pathway (core)	-	Phenylacetate-coenzyme A ligase (EC 6.2.1.30) PaaF	1	-65	91.11	135	1
GoM315	Metabolism of Aromatic Compounds	Phenylacetyl-CoA catabolic pathway (core)	-	Phenylacetic acid degradation operon negative regulatory protein PaaX	1	-7	54.9	51	1
GoM315	Metabolism of Aromatic Compounds	Phenylacetyl-CoA catabolic pathway (core)	-	Phenylacetic acid degradation protein PaaN, ring-opening aldehyde dehydrogenase (EC 1.2.1.3)	4	-21.25	66.94	78	4
GoM315	Metabolism of Aromatic Compounds	Phenylacetyl-CoA catabolic pathway (core)	-	Phenylacetic acid degradation protein PaaN2, ring-opening aldehyde dehydrogenase (EC 1.2.1.3)	1	-14	75.47	53	1

## Sheet: Supplemental Table 2
Supplementary Information Table S2. NCBI BlastX and BlastN matches of GoM clones. Clone sequences from each respective library were assembled into operational taxonomic units (OTUs) of ≥97% sequence identity using Lasergene 7.2 (DNASTAR Inc., Madison, WI).
Sample	OTU	BlastX	Accession Number	Blast X	BlastN	Accession Number	Blast N
				e-Value			e-Value
GoM278	bssA 1	Benzylsuccinate synthase alpha subunit [Uncultured bacterium clone EC_clone_bssA40 ]	AEO79008	5e-150	bssA - Thauera aromatica tdiSR and bssDCAB operons for benzylsuccinate synthase and a two-	AJ001848	1e-57
	(JX135113)		(protein)		component regulatory system
		{Isolation source = oily sludge incubated for 500 days under methanogenic conditions without any addition of carbon sources}	JF754547
			(nucleotide)
	bssA 2	Benzylsuccinate synthase alpha subunit [Uncultured bacterium clone LA07bs04]	ADG27770	1e-145	Uncultured bacterium clone LA07bs07 benzylsuccinate synthase	GU133296	2e-100
	(JX135114)		(protein)		alpha subunit (bssA) gene, partial cds
		{Isolation source = toluene-degrading SIP microcosms ‘heavy' DNA}	GU133294
			(nucleotide)		{Isolation source = toluene-degrading SIP microcosms ‘heavy' DNA}
	bssA 3	BssA [Uncultured bacterium clone bssAD10]	ACR82335.1	6e-171	Uncultured bacterium clone bssAD10 BssA (bssA) gene, partial	FJ810648	0
	(JX135115)		(protein)		Cds
		{Isolation source = coal tar waste-contaminated groundwater}	FJ810648.1
			(nucleotide)		{Isolation source = coal tar waste-contaminated groundwater}
	bssA 4	Benzylsuccinate synthase alpha subunit [Uncultured bacterium clone LA07bs04]	ADG27770	1e-145	bssA - Azoarcus sp. T two-component regulatory system and benzylsuccinate synthase operons	AY032676	2e-51
	(JX135116)		(protein)
		{Isolation source = toluene-degrading SIP microcosms ‘heavy' DNA}	GU133294
			(nucleotide)
GoM315	bssA 1	Benzylsuccinate synthase alpha subunit [Uncultured bacterium clone LA07bs04]	ADG27770	1e-145	Uncultured bacterium clone LA07bs07 benzylsuccinate synthase	GU133296	2e-100
	(JX135125)		(protein)		alpha subunit (bssA) gene, partial cds
		{Isolation source = toluene-degrading SIP microcosms ‘heavy' DNA}	GU133294
			(nucleotide)		{Isolation source = toluene-degrading SIP microcosms ‘heavy' DNA}
	bssA 2	Benzylsuccinate synthase alpha subunit [Uncultured bacterium clone EC_clone_bssA40 ]	AEO79008	5e-150	bssA -Thauera aromatica tdiSR and bssDCAB operons for benzylsuccinate synthase and a two-	AJ001848	1e-57
	(JX135126)		(protein)		component regulatory system
		{Isolation source = oily sludge incubated for 500 days under methanogenic conditions without any addition of carbon sources}	JF754547
			(nucleotide)
	bssA 3	Benzylsuccinate synthase alpha subunit [Uncultured bacterium clone LA07bs04]	ADG27770	9e-147	bssA - Azoarcus sp. T two-component regulatory system and benzylsuccinate synthase operons,	AY032676	7e-50
	(JX135127)		(protein)		complete sequence
		{Isolation source = toluene-degrading SIP microcosms ‘heavy' DNA}	GU133294
			(nucleotide)
	bssA 4	BssA [Uncultured bacterium clone bssAD10]	ACR82335	6e-173	Uncultured bacterium clone bssAD10 BssA (bssA) gene, partial cds	FJ810648	0
	(JX135128)		(protein)
		{Isolation source = coal tar waste-contaminated groundwater}	FJ810648		{Isolation source = coal tar waste-contaminated groundwater}
			(nucleotide)
GoM278	assA 1	1-Methyl alkyl succinate synthase, subunit MasD [“Aromatoleum” sp. HxN1]	CAO03074	3e-81	No similarity found	NA	NA
	(JX135105)		(protein)
			AM748709
			(nucleotide)
	assA 2	Alkylsuccinate synthase (AssA) [Prokaryote enrichment culture clone SDB_OTU2]	ADJ51074	2e-85	No similarity found	NA	NA
	(JX135106)		(protein)
		{Isolation source = methanogenic paraffin degrading enrichment}	GU453644
			(nucleotide)
	assA 3	Uncultured prokaryote clone Arthur_Kill_OTU2, alkylsuccinate synthase (AssA)	ADJ51071	2e-109	Uncultured prokaryote clone Arthur_Kill_OTU2, alkylsuccinate synthase (assA) gene, partial cds	GU453641	0
	(JX135107)		(protein)
		{Isolation source = contaminated river sediment}	GU453641		{Isolation source = contaminated river sediment}
			(nucleotide)
	assA 4	1-Methyl alkyl succinate synthase, subunit MasD [“Aromatoleum” sp. HxN1]	CAO03074	4e-83	No similarity found	NA	NA
	(JX135108)		(protein)
			AM748709
			(nucleotide)
	assA 5	Alkylsuccinate synthase (AssA) [Prokaryote enrichment culture clone SDB_OTU2]	ADJ51074	3e-80	No similarity found	NA	NA
	(JX135109)		(protein)
		{Isolation source = methanogenic paraffin degrading enrichment}	GU453644
			(nucleotide)
	assA 6	1-Methyl alkyl succinate synthase, subunit MasD [“Aromatoleum” sp. HxN1]	CAO03074	1e-86	No similarity found	NA	NA
	(JX135110)		(protein)
			AM748709
			(nucleotide)
	assA 7	1-Methyl alkyl succinate synthase, subunit MasD [“Aromatoleum” sp. HxN1]	CAO03074	2e-84	No similarity found	NA	NA
	(JX135111)		(protein)
			AM748709
			(nucleotide)
	assA 8	Uncultured prokaryote clone Arthur_Kill_OTU5, alkylsuccinate synthase (AssA)	ADJ51070	1e-110	Uncultured prokaryote clone Arthur_Kill_OTU5 alkylsuccinate synthase (assA) gene, partial cds	GU453640	0
	(JX135112)		(protein)
		{Isolation source = contaminated river sediment}	GU453640		{Isolation source = contaminated river sediment}
			(nucleotide)
GoM315	assA 1	Alkylsuccinate synthase [prokaryote enrichment culture clone SDB_OTU2]	ADJ51074	6e-83	No similarity found	NA	NA
	(JX135117)		(protein)
		{Isolation source = methanogenic, paraffin degrading enrichment}	GU453644
			(nucleotide)
	assA 2	1-Methyl alkyl succinate synthase, subunit MasD [“Aromatoleum” sp. HxN1]	CAO03074	2e-82	No similarity found	NA	NA
	(JX135118)		(protein)
			AM748709
			(nucleotide)
	assA 3	Alkylsuccinate synthase [prokaryote enrichment culture clone SDB_OTU2]	ADJ51074	2e-85	No similarity found	NA	NA
	(JX135119)		(protein)
		{Isolation source = methanogenic, paraffin degrading enrichment}	GU453644
			(nucleotide)
	assA 4	Alkylsuccinate synthase synthase alpha subunit, partial [Uncultured prokaryote clone SL34assA-2]	AEY68271 (protein)	4e-82	No similarity found	NA	NA
	(JX135120)		JN652007
		{Isolation source = thermophilic alkane-degrading methanogenic consortium enriched from production water of Shengli oil reservoir}	(nucleotide)
	assA 5	Uncultured prokaryote clone Arthur_Kill_OTU2, alkylsuccinate synthase (AssA)	ADJ51071	2e-109	Uncultured prokaryote clone Arthur_Kill_OTU2 alkylsuccinate synthase (assA) gene, partial cds	GU453641	0
	(JX135121)		(protein)
		{Isolation source = contaminated river sediment}	GU453641		{Isolation source = contaminated river sediment}
			(nucleotide)
	assA 6	Uncultured prokaryote clone Arthur_Kill_OTU5, alkylsuccinate synthase (AssA)	ADJ51070	3e-80	No similarity found	NA	NA
	(JX135122)		(protein)
		{Isolation source = contaminated river sediment}	GU453640
			(nucleotide)
	assA 7	Uncultured prokaryote clone Arthur_Kill_OTU4, alkylsuccinate synthase (AssA)	ADJ51069	7e-93	No similarity found	NA	NA
	(JX135123)		(protein)
		{Isolation source = contaminated river sediment}	GU453639
			(nucleotide)
	assA 8	1-Methyl alkyl succinate synthase, subunit MasD [“Aromatoleum” sp. HxN1]	CAO03074	8e-81	No similarity found	NA	NA
	(JX135124)		(protein)
			AM748709
			(nucleotide)
